# Supplementary material
Source: MDPI journal article supplement (https://www.mdpi.com/2073-4344/7/5/150)
Supplement: s1 [file s1]

# Supplementary Materials: Synthesis of SAPO-34 Molecular Sieves via Novel Intermittent Hydrothermal Treatment and Its Effect on the Crystallization and Product Properties

Zhihui Guo, Ping Miao, Weiping Zhu, Lei Guo, Fei Li, Yunpeng Xue, Qi Yin, Ruixue Yuan and Lianbin Xu

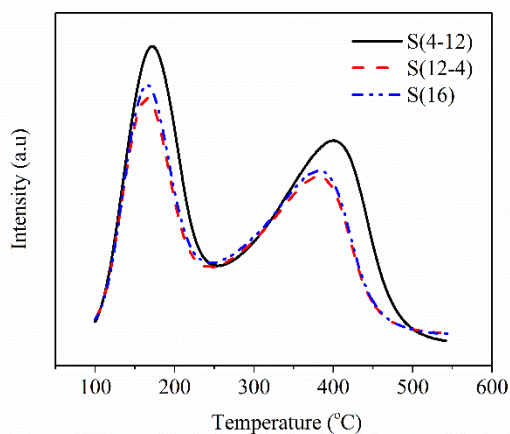

**Figure S1.** NH<sub>3</sub>-TPD profiles of the samples S(4-12), S(12-4) and S(16).

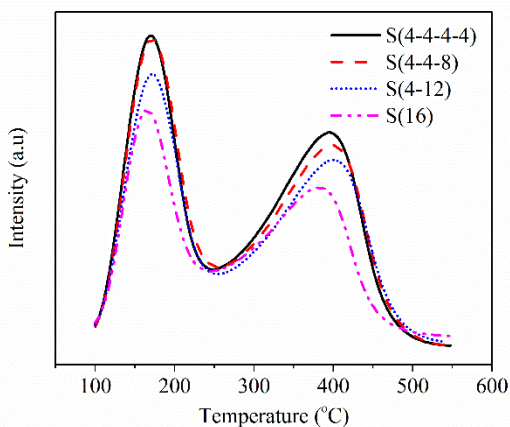

**Figure S2.** NH<sub>3</sub>-TPD profiles of the samples synthesized with different crystallization time distribution in the multi-stage intermittent crystallization.

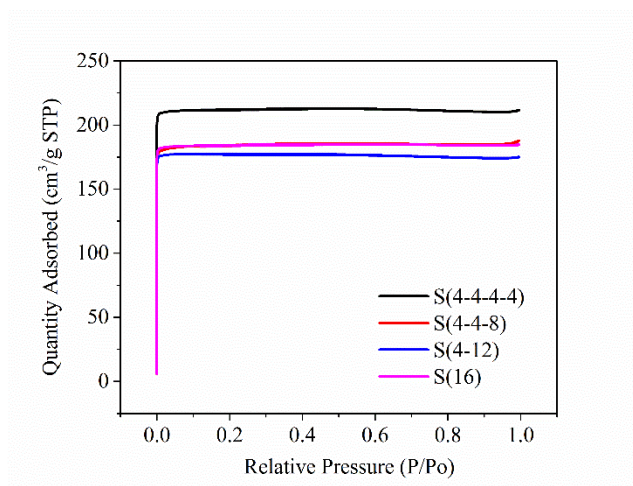

**Figure S3.** N<sub>2</sub> adsorption/desorption isotherms of the samples synthesized with different crystallization time distribution in the multi-stage intermittent crystallization.
